# Supplementary material for: Predictive Factors for Difficult Laparoscopic Cholecystectomies in Acute Cholecystitis
Source: MDPI journal article supplement (doi:10.3390/diagnostics14030346), 2024-02-05
Supplement: s1 [file s1]

Table 1. Clinical and biological data of the patients included in the study groups:

| Variable                                                            | Normal LC group<br>(N = 150)                                                        | Difficult LC group<br>(N = 105)                                                        | p-Value                |
|---------------------------------------------------------------------|-------------------------------------------------------------------------------------|----------------------------------------------------------------------------------------|------------------------|
| <b>Age (mean±SD, years)</b><br><br>(mean, range, median)            | 52.4 (± 16.2)<br>Range: (19.0; 90.0)<br>52(IQR 12)                                  | 57.1 (± 14.2)<br>Range: (19.0; 83.0)<br>57(IQR 16)                                     | 0.009 <sup>a</sup> *)  |
| <b>Leukocytes (cells/microliter)</b><br><br>(mean, range, median)   | 9622.5 (± 4170.5)<br>Range: (2100.0; 31000.0)<br><b>8700.0 (IQR 4987.5)</b>         | 12731.6 (± 7216.8)<br>Range: (3900.0; 51200.0)<br><b>11400.0 (IQR 7100.0)</b>          | <0.001 <sup>a</sup> *) |
| <b>Neutrophils (%)</b><br><br>(mean, range, median)                 | 0.7 (± 0.1)<br>Range: (0.3; 0.9)<br><b>0.7 (IQR 0.1)</b>                            | 0.7 (± 0.1)<br>Range: (0.1; 0.9)<br><b>0.7 (IQR 0.3)</b>                               | 0.001 <sup>a</sup> *)  |
| <b>Lymphocytes (%)</b><br><br>(mean, range, median)                 | 0.2 (± 0.1)<br>Range: (0.01; 0.6)<br>0.18 (IQR 0.17)                                | 0.1 (± 0.1)<br><b>Range: (0.004; 0.8)</b><br><b>0.13 (IQR 0.15)</b>                    | 0.002 <sup>a</sup> *)  |
| <b>NLR</b><br><br>(mean, range, median)                             | 6.3 (± 7.8)<br>Range: (0.4; 50.74)<br><b>3.98 (IQR 4.8)</b>                         | 11.06 (± 25.05)<br>Range: (0.02; 232.5)<br><b>6.2 (IQR 6.72)</b>                       | 0.001 <sup>a</sup> *)  |
| <b>Thrombocytes (cells/microliter)</b><br><br>(mean, range, median) | 247622.7 (± 81254.3)<br>Range: (74000.0; 763000.0)<br><b>244500.0 (IQR 87000.0)</b> | 264731.4 (± 174673.6)<br>Range: (68000.0; 1700000.0)<br><b>240000.0 (IQR 103000.0)</b> | 0.839 <sup>a</sup> )   |
| <b>Fibrinogen (mg/dL)</b><br><br>(mean, range, median)              | 409.8 (± 127.3)<br>Range: (189.4; 990.0)<br><b>374.5 (IQR 129.03)</b>               | 574.5 (± 238.7)<br>Range: (206.0; 1220.0)<br><b>570.0 (IQR 351.0)</b>                  | <0.001 <sup>a</sup> *) |
| <b>INR (UI/L)</b><br><br>(mean, range, median)                      | 1.2 (± 0.3)<br>Range: (0.9; 3.7)<br><b>1.15 (IQR 0.16)</b>                          | 1.3 (± 1.2)<br>Range: (0.9; 13.2)<br><b>1.21 (IQR 0.22)</b>                            | 0.021 <sup>a</sup> *)  |

|                                                         |                                                                 |                                                                 |                        |
|---------------------------------------------------------|-----------------------------------------------------------------|-----------------------------------------------------------------|------------------------|
| <b>AST (UI/L)</b><br>(mean, range, median)              | 54.6 (± 86.4)<br>Range: (2.4; 664.0)<br><b>28.0 (IQR 28.75)</b> | 57.5 (± 99.9)<br>Range: (7.0; 952.0)<br><b>30.0 (IQR 44.0)</b>  | 0.532 <sup>a)</sup>    |
| <b>ALT (UI/L)</b><br>(mean, range, median)              | 74.8 (± 90.6)<br>Range: (1.3; 532.0)<br><b>46.0 (IQR 44.0)</b>  | 70.8 (± 89.4)<br>Range: (11.0; 627.0)<br><b>37.0 (IQR 53.0)</b> | 0.17 <sup>a)</sup>     |
| <b>Total Bilirubin (mg/dL)</b><br>(mean, range, median) | 1.1 (± 1.3)<br>Range: (0.2; 10.4)<br><b>0.7 (IQR 0.6)</b>       | 1.2 (± 1.9)<br>Range: (0.2; 11.1)<br><b>0.7 (IQR 0.6)</b>       | 0.715 <sup>a)</sup>    |
| <b>Creatinine (mg/dL)</b><br>(mean, range, median)      | 0.8 (± 0.3)<br>Range: (0.3; 3.5)<br><b>0.8 (IQR 0.2)</b>        | 0.9 (± 0.5)<br>Range: (0.4; 3.1)<br><b>0.82 (IQR 0.3)</b>       | 0.187 <sup>a)</sup>    |
| <b>Tongyoo score</b>                                    | 2.9±1.4<br>Range: (0; 6.0)<br>2.5(IQR 2.0)                      | 6.0(± 2.6)<br>Range: (2.0; 13.0)<br>6.0(IQR 2.1)                | <0.001 <sup>a)</sup> * |

Footnote: <sup>a)</sup> p- value was assessed with the Mann-Whitney. The alpha risk was set to 5% ( $\alpha = 0.05$ ); <sup>b)</sup> p- value was tested with the Chi-squared test. The alpha risk was set to 0.05; \*statistically significant; ASA - The American Society of Anesthesiologists (ASA) physical status classification system; NLR: neutrophil-to-lymphocyte ratio; CBD: common bile duct.

**Table 2.** Imagistic data of the patients included in the study

| Variable                                                | Normal LC<br>(N = 150)                               | Difficult LC<br>(N = 105)                               | p-Value                |
|---------------------------------------------------------|------------------------------------------------------|---------------------------------------------------------|------------------------|
| CBD (mm)<br>(mean, range, median)                       | 5.0 (± 2.3)<br>Range: (3.0; 18.0)<br>4.0 (IQR 1.0)   | 5.0 (± 2.0)<br>Range: (3.0; 13.0)<br>4.0 (IQR 1.0)      | 0.546 <sup>a)</sup>    |
| Transverse diameter of GB<br>(mm) (mean, range, median) | 28.8 (± 7.9)<br>Range: (3.0; 58.0)<br>29.5 (IQR 7.0) | 36.5 (± 12.3)<br>Range: (15.0; 77.0)<br>35.0 (IQR 12.0) | <0.001 <sup>a)</sup> * |
| Length of GB (mm)<br>(mean, range, median)              | 79.5 (± 18.6)<br>Range: (25.3; 140.5)                | 93.3 (± 27.2)<br>Range: (40.1; 175.4)                   | <0.001 <sup>a)</sup> * |

|                                                    |                                                         |                                                         |                        |
|----------------------------------------------------|---------------------------------------------------------|---------------------------------------------------------|------------------------|
|                                                    | 79.7 (IQR 24.7)                                         | 90.3 (IQR 40.0)                                         |                        |
| Thickness of GB wall (mm)<br>(mean, range, median) | 4.2 ( $\pm$ 1.5)<br>Range: (2.0; 10.0)<br>4.0 (IQR 2.0) | 6.1 ( $\pm$ 2.9)<br>Range: (2.0; 22.0)<br>6.0 (IQR 3.0) | <0.001 <sup>a)</sup> * |

Footnote: <sup>a)</sup> p- value was assessed with the Mann-Whitney. The alpha risk was set to 5% ( $\alpha$  = 0.05); <sup>b)</sup> p-value was tested with the Chi-squared test. The alpha risk was set to 0.05; \*statistically significant;
